# Supplementary material for: Decline in Mortality Due to Varicella after Implementation of Varicella Vaccination in the United States
Source: Atypon-hosted journal article supplement (doi:10.1056/nejmoa042271), 2005-02-02
Supplement: 450sa1.pdf [file 450sa1.pdf]

# Supplementary Appendix 1

This appendix has been provided by the authors to give readers additional information about their work.

Supplement to: Nguyen HQ, Jumaan AO, Seward JF. Decline in mortality due to varicella after implementation of varicella vaccination in the United States. *N Engl J Med* 2005;352:450-8.

## Appendix 1. Ninth and Tenth Revision of the International Classification of Diseases

(ICD-9 and ICD-10) codes.

| Condition or complication | ICD 9*                                                                                                                                         | ICD10                                                                                                                                      |
|---------------------------|------------------------------------------------------------------------------------------------------------------------------------------------|--------------------------------------------------------------------------------------------------------------------------------------------|
| High-risk pre-existing    |                                                                                                                                                |                                                                                                                                            |
| conditions                |                                                                                                                                                |                                                                                                                                            |
| Malignancies              | 140.0-165.9, 170.0-175.0, 179.0-<br>208.9                                                                                                      | C00.0-C97.0                                                                                                                                |
| Immune deficiency         | 279.0-279.9                                                                                                                                    | D89.0-D89.9                                                                                                                                |
| HIV/AIDS                  | 042.0-044.9                                                                                                                                    | B20.0-B24.0                                                                                                                                |
| Complications             |                                                                                                                                                |                                                                                                                                            |
| Central nervous system    | 334.3, 334.9, 781.3, 049.9, 323.8,                                                                                                             | B01.0, B01.1, A87.8, A87.9,                                                                                                                |
| complications             | 323.9, 047.8, 047.9, 322.0-322.9,<br>348.1-348.5, 348.9, 331.8                                                                                 | G04.8, G04.9, G93.1-G93.9,<br>G03.0-G03.9, R27.0, R27.8                                                                                    |
| Hemorrhagic               | 286.6, 286.9, 287.0-287.5, 287.9                                                                                                               | D65.0, D68.0, D69.0-D69.9                                                                                                                  |
| Secondary infections      | 034.1, 035, 040.0-040.9, 041.0-<br>041.9, 729.4, 420.0-420.9, 421.0,<br>421.1, 421.9, 429.0, 320.1-320.3,<br>320.8-320.9, 680.0-684.0, 6686.0, | A46, 40.0-41.9, 48.0-49.9, G00.1-<br>G00.9, G04.8-G04.9, G06.0-<br>G06.2, I30.0, I30.8, I30.9, I40.9,<br>L01.0, L01.1, L02.0-L04.9, L08.0, |

|           |                                    |                                    |
|-----------|------------------------------------|------------------------------------|
|           | 686.8-686.9, 038.0-038.9, 790.7,   | L08.8, L08.9, M72.5                |
|           | 324.0, 324.1, 324.9, 326           |                                    |
| Pneumonia | 481.0, 480.8, 480.9, 486.0, 483.0, | B01.2, J12.8, J12.9, J16.0, J16.8, |
|           | 485.0                              | J18.0, J18.8, J18.9                |

---

\*previously published by Meyers et al.
